# Supplementary material for: Incidence and risk factors for colorectal cancer in Africa: a systematic review and meta-analysis
Source: PubMed Central journal article supplement — BMC Gastroenterol. 2024 Sep 9;24:303. doi: 10.1186/s12876-024-03385-7 (PMC11382465; doi:10.1186/s12876-024-03385-7), 2024-09-09
Supplement: 12876_2024_3385_MOESM1_ESM.pdf [file 12876_2024_3385_MOESM1_ESM.pdf]

**SUPPLEMENTARY MATERIAL**

**Supplementary Table 1: Search Strategy**

| Ovid MEDLINE(R) and In-Process, In-Data-Review & Other Non-Indexed Citations <1946 to August 10, 2021> |                                                                                                                                                                                                                                                                                                                                                                                                                                                                                                                                                                                                                                                                                                                                                                                                                |         |
|--------------------------------------------------------------------------------------------------------|----------------------------------------------------------------------------------------------------------------------------------------------------------------------------------------------------------------------------------------------------------------------------------------------------------------------------------------------------------------------------------------------------------------------------------------------------------------------------------------------------------------------------------------------------------------------------------------------------------------------------------------------------------------------------------------------------------------------------------------------------------------------------------------------------------------|---------|
|                                                                                                        |                                                                                                                                                                                                                                                                                                                                                                                                                                                                                                                                                                                                                                                                                                                                                                                                                |         |
| 1                                                                                                      | exp Colorectal Neoplasms/                                                                                                                                                                                                                                                                                                                                                                                                                                                                                                                                                                                                                                                                                                                                                                                      | 212708  |
| 2                                                                                                      | ((anal or anus or bowel or circumanal or colon or colorectal or lynch or perianal or rectal or rectum or sigmoid) adj3 (adenoma or adenocarcinoma or cancer or cancerous or carcinoma or malignant or malignancy or neoplasm or neoplastic or oncology or oncological or tumor or tumour)).mp. [mp=title, abstract, original title, name of substance word, subject heading word, floating sub-heading word, keyword heading word, organism supplementary concept word, protocol supplementary concept word, rare disease supplementary concept word, unique identifier, synonyms]                                                                                                                                                                                                                             | 215837  |
| 3                                                                                                      | 1 or 2                                                                                                                                                                                                                                                                                                                                                                                                                                                                                                                                                                                                                                                                                                                                                                                                         | 280148  |
| 4                                                                                                      | exp Africa/                                                                                                                                                                                                                                                                                                                                                                                                                                                                                                                                                                                                                                                                                                                                                                                                    | 286464  |
| 5                                                                                                      | (Africa or African or Africans or Algeria or Angola or Ascension or Benin or Botswana or "Burkina Faso" or Burundi or "Cabo Verde" or Cameroon or "Central African Republic" or Chad or Comoros or "Cote d'Ivoire" or Congo or Djibouti or Egypt or "Equatorial Guinea" or Eritrea or Eswatini or Ethiopia or Gabon or Gambia or Ghana or "Guinea-Bissau" or Guinea or Kenya or Lesotho or Liberia or Libya or Madagascar or Malawi or Mali or Mauritania or Mauritius or Morocco or Mozambique or Namibia or Niger or Nigeria or Principe or Rwanda or "Saint Helena" or "Sao Tome" or Senegal or Seychelles or "Sierra Leone" or Somalia or "South Africa" or "South Sudan" or "Sub-Saharan" or Sudan or Swaziland or Tanzania or Togo or "Tristan da Cunha" or Tunisia or Uganda or Zambia or Zimbabwe).mp. | 708356  |
| 6                                                                                                      | 4 or 5                                                                                                                                                                                                                                                                                                                                                                                                                                                                                                                                                                                                                                                                                                                                                                                                         | 708356  |
| 7                                                                                                      | 3 and 6                                                                                                                                                                                                                                                                                                                                                                                                                                                                                                                                                                                                                                                                                                                                                                                                        | 2891    |
| 8                                                                                                      | exp Risk Factors/                                                                                                                                                                                                                                                                                                                                                                                                                                                                                                                                                                                                                                                                                                                                                                                              | 880885  |
| 9                                                                                                      | exp Epidemiology/                                                                                                                                                                                                                                                                                                                                                                                                                                                                                                                                                                                                                                                                                                                                                                                              | 27568   |
| 10                                                                                                     | exp Morbidity/                                                                                                                                                                                                                                                                                                                                                                                                                                                                                                                                                                                                                                                                                                                                                                                                 | 595668  |
| 11                                                                                                     | exp Risk Assessment/                                                                                                                                                                                                                                                                                                                                                                                                                                                                                                                                                                                                                                                                                                                                                                                           | 289203  |
| 12                                                                                                     | exp "Correlation of Data"/                                                                                                                                                                                                                                                                                                                                                                                                                                                                                                                                                                                                                                                                                                                                                                                     | 2070    |
| 13                                                                                                     | (risk or correlat* or predict* or factors).mp. [mp=title, abstract, original title, name of substance word, subject heading word, floating sub-heading word, keyword heading word, organism supplementary concept word, protocol supplementary concept word, rare disease supplementary concept word, unique identifier, synonyms]                                                                                                                                                                                                                                                                                                                                                                                                                                                                             | 8188068 |
| 14                                                                                                     | exp Genes/                                                                                                                                                                                                                                                                                                                                                                                                                                                                                                                                                                                                                                                                                                                                                                                                     | 797379  |
| 15                                                                                                     | exp Genetic Predisposition to Disease/                                                                                                                                                                                                                                                                                                                                                                                                                                                                                                                                                                                                                                                                                                                                                                         | 145858  |

|    |                                                                                                                                                                                                                                                                                                                                                                                                                                                                                                                                                                              |         |
|----|------------------------------------------------------------------------------------------------------------------------------------------------------------------------------------------------------------------------------------------------------------------------------------------------------------------------------------------------------------------------------------------------------------------------------------------------------------------------------------------------------------------------------------------------------------------------------|---------|
| 16 | exp Colorectal Neoplasms/ge [Genetics]                                                                                                                                                                                                                                                                                                                                                                                                                                                                                                                                       | 39128   |
| 17 | exp Genetic Variation/                                                                                                                                                                                                                                                                                                                                                                                                                                                                                                                                                       | 1120454 |
| 18 | (Genetic or gene or "family history" or mother or father or brother or sister or sibling or polymorphism or mutation or allele or predisposition or predisposed or variant or genotype or hereditary or heritable or inherited).mp. [mp=title, abstract, original title, name of substance word, subject heading word, floating sub-heading word, keyword heading word, organism supplementary concept word, protocol supplementary concept word, rare disease supplementary concept word, unique identifier, synonyms]                                                      | 3979145 |
| 19 | exp Life Style/                                                                                                                                                                                                                                                                                                                                                                                                                                                                                                                                                              | 100670  |
| 20 | exp Smokers/                                                                                                                                                                                                                                                                                                                                                                                                                                                                                                                                                                 | 2962    |
| 21 | exp Ex-Smokers/                                                                                                                                                                                                                                                                                                                                                                                                                                                                                                                                                              | 127     |
| 22 | exp Alcoholics/                                                                                                                                                                                                                                                                                                                                                                                                                                                                                                                                                              | 858     |
| 23 | exp Alcohol Drinking/                                                                                                                                                                                                                                                                                                                                                                                                                                                                                                                                                        | 72398   |
| 24 | exp Diet/                                                                                                                                                                                                                                                                                                                                                                                                                                                                                                                                                                    | 298555  |
| 25 | exp Exercise/                                                                                                                                                                                                                                                                                                                                                                                                                                                                                                                                                                | 214352  |
| 26 | exp Tobacco Products/                                                                                                                                                                                                                                                                                                                                                                                                                                                                                                                                                        | 8989    |
| 27 | exp Smoking/                                                                                                                                                                                                                                                                                                                                                                                                                                                                                                                                                                 | 153243  |
| 28 | exp Feeding Behavior/                                                                                                                                                                                                                                                                                                                                                                                                                                                                                                                                                        | 179306  |
| 29 | exp Health Behavior/                                                                                                                                                                                                                                                                                                                                                                                                                                                                                                                                                         | 338684  |
| 30 | exp "Tobacco Use"/                                                                                                                                                                                                                                                                                                                                                                                                                                                                                                                                                           | 6692    |
| 31 | (smoking or alcohol or lifestyle or "life style" or diet or food or foods or cigarette or cigar or tobacco or beer or wine or drinker or smoker or high fat or exercise or "Physical activity" or "environmental factors" or sedentary or Inactivity or "High fiber" or "low fiber").mp. [mp=title, abstract, original title, name of substance word, subject heading word, floating sub-heading word, keyword heading word, organism supplementary concept word, protocol supplementary concept word, rare disease supplementary concept word, unique identifier, synonyms] | 2139694 |
| 32 | exp Inflammatory Bowel Diseases/                                                                                                                                                                                                                                                                                                                                                                                                                                                                                                                                             | 85732   |
| 33 | exp Diabetes Mellitus/                                                                                                                                                                                                                                                                                                                                                                                                                                                                                                                                                       | 450653  |
| 34 | exp Adenomatous Polyps/                                                                                                                                                                                                                                                                                                                                                                                                                                                                                                                                                      | 8256    |
| 35 | exp Colonic Polyps/                                                                                                                                                                                                                                                                                                                                                                                                                                                                                                                                                          | 8898    |
| 36 | exp Obesity/                                                                                                                                                                                                                                                                                                                                                                                                                                                                                                                                                                 | 229136  |
| 37 | (Crohns or Colitis or diabetes or "Adenomatous Polypos*" or "lynch syndrome" or "adenomatous polyps" or "sessile serrated lesions" or "SSLs lesions" or obesity or "Polyposis Syndrome" or "Familial Polypos*" or obese or "Myh-Associated Polypos*" or "Intestinal Polypos*" or "Gardner Syndrome" or "Muir-Torre Syndrome").mp. [mp=title, abstract, original title, name of substance word, subject heading word, floating sub-heading word, keyword heading word, organism supplementary concept word, protocol                                                          | 1061586 |

|    |                                                                                                                                                                                                                                                                                                                                                    |          |
|----|----------------------------------------------------------------------------------------------------------------------------------------------------------------------------------------------------------------------------------------------------------------------------------------------------------------------------------------------------|----------|
|    | supplementary concept word, rare disease supplementary concept word, unique identifier, synonyms]                                                                                                                                                                                                                                                  |          |
| 38 | 8 or 9 or 10 or 11 or 12 or 13 or 14 or 15 or 16 or 17 or 18 or 19 or 20 or 21 or 22 or 23 or 24 or 25 or 26 or 27 or 28 or 29 or 30 or 31 or 32 or 33 or 34 or 35 or 36 or 37                                                                                                                                                                     | 12807796 |
| 39 | 3 and 6 and 38                                                                                                                                                                                                                                                                                                                                     | 2158     |
| 40 | exp animals/ not humans.sh.                                                                                                                                                                                                                                                                                                                        | 4867788  |
| 41 | 39 not 40                                                                                                                                                                                                                                                                                                                                          | 2137     |
| 42 | ("African American*" not ("African american" and African)).mp. [mp=title, abstract, original title, name of substance word, subject heading word, floating sub-heading word, keyword heading word, organism supplementary concept word, protocol supplementary concept word, rare disease supplementary concept word, unique identifier, synonyms] | 42416    |
| 43 | 41 not 42                                                                                                                                                                                                                                                                                                                                          | 1559     |

**Supplementary Table 2: Characteristics of studies that reported incidence of CRC in Africa and included in the meta-analysis**

| Study                        | Year of Study | Country        | Period      | ASIR (per 100,000 population) |        |
|------------------------------|---------------|----------------|-------------|-------------------------------|--------|
|                              |               |                |             | Male                          | Female |
| Katsidzira et al. (2016)     | 2016          | Zimbabwe       | 2003-2012   | 14.8                          | 14.2   |
| Timotewo et al (2017)        | 2017          | Ethiopia       | 2012–2013   | 7.6                           | 7.0    |
| Walker et al (2001)          | 2001          | South Africa   | 1995–1999   | 1.7                           | 2.0    |
| Walker et al (1996)          | 1996          | South Africa   | 1993–1995   | 24.7                          | 19.3   |
| Wentik et al (2010)          | 2010          | South Africa   | 2002-2009   | 3.7                           | 3.9    |
| Agyemang-Yeboah et al (2017) | 2017          | Kumasi, Ghana  | 2009-2015   | 5.2                           | 4.1    |
| Missaoui et al (2010)        | 2010          | Tunisia        | 1993-2007   | 11.7                          | 10.0   |
| Bayo et al (1990)            | 1990          | Bamako, Mali   | 1987-1988   | 4.4                           | 1.7    |
| Bodalal et al (2014)         | 2014          | Bengazi, Libya | 2012        | 17.5                          | 17.2   |
| Adnane Tazi et al (2013)     | 2013          | Rabat, Morocco | 2006 - 2008 | 12.0                          | 9.0    |

| Study                    | Year of Study | Country                 | Period      | ASIR (per 100,000 population) |        |
|--------------------------|---------------|-------------------------|-------------|-------------------------------|--------|
|                          |               |                         |             | Male                          | Female |
| Khiari et al (2018)      | 2018          | Northern Tunisia        | 2007 - 2009 | 13.6                          | 11.1   |
| Benarba et al (2014)     | 2014          | Northwest Algeria       | 2000 - 2010 | 1.0                           | 1.3    |
| Katalambula et al (2016) | 2016          | Tanzania                |             | 3.8                           | 3.0    |
| KOULIBALY et al (1997)   | 1997          | Conakry, Guinea         | 1992–1994   | 1.9                           | 0.7    |
| Lorenzoni et al (2020)   | 2020          | Maputo, Mozambique      | 2015–2017)  | 3.0                           | 2.6    |
| Lorenzoni et al (2020)   | 2020          | Beira, Mozambique       | 2014–2017   | 2.0                           | 1.8    |
| Medhin et al (2019)      | 2019          | Eritrea                 | 2011–2017   | 9.97                          | 6.2    |
| Motsuku et al (2021)     | 2021          | South Africa            | 2002–2014   | 11.01                         | 6.81   |
| Saeed et al (2014)       | 2014          | Khartoum, Sudan         | 2009–2010.  | 6.2                           | 5.9    |
| Veruttipong et al (2012) | 2012          | Egypt                   | 1999-2007   | 6.1                           | 4.9    |
| Wabinga et al (2000)     | 2000          | Kyadondo county, Uganda | 1960-1966   | 3.0                           | 2.7    |
| Wabinga et al (2000)     | 2000          | Kyadondo county, Uganda | 1967-1971   | 4.8                           | 6.3    |
| Wabinga et al (2000)     | 2000          | Kyadondo county, Uganda | 1991-1994   | 8.3                           | 5.7    |
| Wabinga et al (2000)     | 2000          | Kyadondo county, Uganda | 1960-1966   | 6.8                           | 6.6    |

**Supplementary table 3: Characteristics of studies reporting associations between various risk factors and CRC**

| Study name             | Country | Study design | Measure of Effect | Risk factors |                 |                     |                  |                              |                  |
|------------------------|---------|--------------|-------------------|--------------|-----------------|---------------------|------------------|------------------------------|------------------|
|                        |         |              |                   | Demographics | MOE (95% CI)    | Lifestyle factors   | MOE (95% CI)     | Dietary risk factors         | MOE (95% CI)     |
| Barbirou et al. (2020) | Tunisia | Case control | Odds ratio        | female       | 2.20 (1.16-4.2) | Alcohol consumption | 3.07 (1.48-6.59) | Meat consumption (0.14-0.57) | 0.22             |
|                        |         |              |                   |              |                 | Tobacco consumption | 1.64 (0.81-3.35) | Fat consumption (3.45-12.3)  | 6.40             |
|                        |         |              |                   |              |                 | Physical activity   | 0.02 (0.01-0.03) | Vegetables                   | 1.28 (0.65-2.38) |
| Baroudi et al. (2014)  | Tunisia | Case control | Odds ratio        |              |                 | Physical activity   | 0.37 (0.19-0.7)  | Vegetables >3x/week          | 0.18(0.1-0.31)   |
|                        |         |              |                   |              |                 | Tobacco consumption | 2.25 (1.56-4.2)  | Tea consumption >1x/day      | 2.9 (1.67-5.09)  |
|                        |         |              |                   |              |                 |                     |                  | Fruits >3x/week              | 0.19 (0.1-0.35)  |
| Kaindi et al. (2018)   | Kenya   | Case control | Odds ratio        |              |                 | Alcohol consumption | 2.2 (1.2-4.2)    | Red Meat consumption         | 1.3 (0.7-2.4)    |

|                        |         |              |            |                                    |                      |                     |                         |                             |                      |
|------------------------|---------|--------------|------------|------------------------------------|----------------------|---------------------|-------------------------|-----------------------------|----------------------|
|                        |         |              |            |                                    |                      | Physical activity   | 0.9<br>(0.3-2.9)        | Processed Meat consumption  | 2.3<br>(0.7-7.1)     |
|                        |         |              |            |                                    |                      | Tobacco smoking     | 1.6<br>(0.8-3.3)        | Fish consumption            | 1.0<br>(0.6-1.7)     |
|                        |         |              |            |                                    |                      |                     |                         | Frequent butter consumption | 2.1<br>(0.4-10.6)    |
| Mahfouz et al. (2014)  | Egypt   | Case control | Odds ratio |                                    |                      | Smoking             | 8.8 (3.9 - 19.3)        | Red meat >500g/week         | 57.1<br>(12.1-270.3) |
|                        |         |              |            |                                    |                      | Alcohol             | 1.1<br>(0.8-1.2)        | Processed meat              | 2.4 (1.5-3.8)        |
|                        |         |              |            |                                    |                      | Obesity             | 1.3<br>(0.7-2.1)        | Fruits/vegetables           | 0.02<br>(0.008-0.09) |
|                        |         |              |            |                                    |                      | Physical activity   | 0.001<br>(0.001-0.0002) | Soft drinks                 | 4.6<br>(1.9-11.01)   |
|                        |         |              |            |                                    |                      |                     |                         | Fresh fish                  | 0.38<br>(0.25-0.59)  |
|                        |         |              |            |                                    |                      |                     |                         | High Calcium diet           | 0.08<br>(0.04-0.17)  |
| Negrichi et al. (2021) | Algeria | Case control | Odds ratio | Family history of CRC (1st degree) | 7.45<br>(1.67-33.23) | Alcohol consumption | 5.48<br>(2.22-13.5)     | Red Meat                    | 1.67<br>(1.11-2.51)  |

|                      |              |              |            |                                        |                      |                                      |                     |                             |                      |
|----------------------|--------------|--------------|------------|----------------------------------------|----------------------|--------------------------------------|---------------------|-----------------------------|----------------------|
|                      |              |              |            | Family history of CRC (2nd/3rd degree) | 4.94<br>(1.39–17.47) | Tobacco smoking                      | 1.99<br>(1.22–3.24) | Fizzy drinks                | 2.66<br>(1.78-3.99)  |
|                      |              |              |            | Any cancer in first-degree relative    | 2.46<br>(1.50–4.05)  | Daily NSAID use                      | 0.17<br>(0.04–0.79) | Yogurt                      | 0.63<br>(0.41-0.96)  |
|                      |              |              |            | Any cancer in 2nd/3rd degree relative  | 2.50<br>(1.61–3.90)  | Occupational exposure to carcinogens | 3.37<br>(1.73–6.55) | Frequent butter consumption | 0.253<br>(0.14-0.43) |
|                      |              |              |            |                                        |                      |                                      |                     | Vegetables                  | 0.28<br>(0.057-1.35) |
|                      |              |              |            |                                        |                      |                                      |                     | Fruits                      | 0.83<br>(0.42-1.65)  |
| Walker et al. (1989) | South Africa | Case control | Odds ratio |                                        |                      |                                      |                     | Low fibre diet              | 1.67<br>(0.44-6.29)  |
|                      |              |              |            |                                        |                      |                                      |                     | High fat diet               | 1.45<br>(0.66-4.80)  |
